# Supplementary material
Source: PubMed Central journal article supplement (PMC4844844)
Supplement: NIHMS778356-supplement-Supplemental.pdf [file NIHMS778356-supplement-Supplemental.pdf]

Supplemental Table 1. **Media Type, Content and Technology Applied to Reminiscence Therapy by Study**

| Reference                                                                                       | Media type                      | Media Content                                        | Technology specified                                              |
|-------------------------------------------------------------------------------------------------|---------------------------------|------------------------------------------------------|-------------------------------------------------------------------|
| Astell, Ellis, Alm, Dye, & Gowans (2010)                                                        | Photographs                     | Group A: personal (from FM), Group B: Era and Region | Laptop                                                            |
| CIRCA (Alm, et al., 2003, 2005, 2007; Astell, Ellis, Bernardi, et al. 2010; Gowans et al. 2004) | Music, photographs, text, video | Era and region                                       | Laptop, monitor, speakers (Astell, Ellis, Bernardi, et al., 2010) |
| Alm et al. (2004) <sup>a</sup>                                                                  | Sound, photographs, video       | NS                                                   | NS                                                                |
| Alm et al. (2004) <sup>b</sup>                                                                  | Music, photographs, video       | Era and region                                       | Touchscreen                                                       |
| Azcurra (2012)                                                                                  | Music                           | NS                                                   | Recordings                                                        |
| Bass & Greger (1996)                                                                            | Music                           | NS                                                   | Audiotape                                                         |
| MINWii (Benveniste et al., 2010; Boulay et al., 2011)                                           | Music, images                   | Era (nursery rhymes)                                 | Computer, TV screen, sensor bar, Wiimote, PC software             |

|                       |                                             |                                        |                                                                                           |
|-----------------------|---------------------------------------------|----------------------------------------|-------------------------------------------------------------------------------------------|
| Caprani et al. (2005) | Music, photographs, text,<br>video (movies) | Era, Personal                          | Proposed system: touchscreen<br>laptop, USB, Audio connection,<br>CD-RW drive, hard drive |
| Cohene et al. (2005)  | Audio, images,<br>photographs, video        | Personal (from FMs and<br>researchers) | Multimedia DVD, remote<br>control                                                         |
| Crispi et al. (2002)  | Audio                                       | Generic                                | Cassette player and tapes,<br>talking toy parrot                                          |
| Gary (2012)           | Audio, photographs, video                   | Personal                               | Touchscreen PC or tablet, brain<br>sensing hardware, cloud server,<br>phone               |
| Green et al. (2012)   | NS                                          | Personal                               | NLP system                                                                                |
| Glynn (1992)          | Music                                       | Generic and Era                        | Cassettes, stereophonic<br>equipment                                                      |

DOI: 10.1177/1090198114537067

“A Systematic Review of the Use of Technology for Reminiscence Therapy”

|                                                                                                                                                                                                   |                                                                                         |                |                                                                                      |
|---------------------------------------------------------------------------------------------------------------------------------------------------------------------------------------------------|-----------------------------------------------------------------------------------------|----------------|--------------------------------------------------------------------------------------|
| Networked Reminiscence Therapy<br>(Hamada et al., 2009; Hattori et al., 2007; Kuwahara, Abe, et al., 2006; Kuwahara, Yasuda, et al., 2006; Kuwahara et al., 2010; Yasuda, Kuwahara, et al., 2009) | Photographs (as a photo video), audio (narration, background music), video (video call) | Personal       | PC (videophone), monitor, USB cameras, microphones, speakers, internet               |
| MemoryLane<br>(Kikhia, Bengtsson, et al., 2010; Kikhia, Hallberg, et al., 2010)                                                                                                                   | Audio, photographs, text, video                                                         | Personal       | GPS, camera, audio recorder, door sensor, mobile phone, desktop                      |
| Kuwahara, Abe, et al., 2006                                                                                                                                                                       | Video (video call)                                                                      | Era            | PC, TV conferencing software, monitors, USB cameras, microphones, speakers, internet |
| Lee & Dey (2008)                                                                                                                                                                                  | Photographs                                                                             | Personal       | SenseCam, digital voice recorder, GPS location logger, software, Tablet PC           |
| L.-J. Lin et al. (2011)*                                                                                                                                                                          | Music, video (“movies”)                                                                 | Era and Region | Records                                                                              |

DOI: 10.1177/1090198114537067

“A Systematic Review of the Use of Technology for Reminiscence Therapy”

|                                 |                                                                                                      |                                    |                                                                                                                      |
|---------------------------------|------------------------------------------------------------------------------------------------------|------------------------------------|----------------------------------------------------------------------------------------------------------------------|
| Moss et al. (2002)*             | Music, video, photographs                                                                            | Generic and Era                    | Cassette, slides                                                                                                     |
| Namazi et al. (1994)*           | Audio                                                                                                | Generic and Era                    | Tape recorder                                                                                                        |
| Piasek et al. (2012)            | Photographs                                                                                          | Personal                           | SenseCam, laptop, software                                                                                           |
| Politis et al. (2004)*          | Music                                                                                                | Generic                            | NS                                                                                                                   |
| Sarne-Fleischmann et al. (2011) | Music, photographs, text,<br>video clips (described in<br>(Sarne-Fleischmann &<br>Tractinsky, 2008)) | Generic and Personal (from<br>FMs) | Touchscreen, Web-based<br>application                                                                                |
| Shik et al. (2009)              | Photographs, audio                                                                                   | Generic and Era                    | Headphones with amplifiers,<br>projector                                                                             |
| Smith et al. (2009)             | Video (with photographs,<br>video clips, narration, and<br>music)                                    | Personal (from PWD and<br>FMs)     | Video cameras, scanners,<br>computers, printers, video<br>editing software, DVDs, DVD<br>players and remote controls |
| Su et al. (2012)*               | Music                                                                                                | Era                                | NS                                                                                                                   |
| Thorgrimsen et al. (2002)*      | Photographs                                                                                          | Generic and Era                    | Slides                                                                                                               |

|                                                       |                                                        |                                                    |                                                                                                 |
|-------------------------------------------------------|--------------------------------------------------------|----------------------------------------------------|-------------------------------------------------------------------------------------------------|
| Tolson & Schofield (2012)                             | Photographs                                            | Interest                                           | Digitized archive                                                                               |
| Wallace et al. (2012)                                 | Photographs (slide show),<br>video                     | Personal (from FMs and<br>friends), Era and Region | Computer, accessible volume<br>dial, USB, RFID                                                  |
| Wallace et al. (2013)                                 | Audio (music and voice<br>recordings), Photographs     | Personal (from FMs and<br>PWD)                     | Camera, screen with USB port,<br>RFID ampoules and reader,<br>microphone, speakers,<br>computer |
| Themed Group RT (Wang et al.<br>(2009); Wang (2007))* | Music                                                  | Era                                                | NS                                                                                              |
| Yamagami et al. (2007)                                | Video                                                  | Era                                                | Video                                                                                           |
| Yasuda, Kuwabara, et al., (2009)                      | Photographs (photo video),<br>audio (narration, music) | Personal (from FM)                                 | NS                                                                                              |
| Yasuda et al. (2013)                                  | Same media as Kuwahara et<br>al. (2010)                | Same content as Kuwahara et<br>al., 2010           | Touchscreen, web camera,<br>server, scanner, internet,<br>Firefox, Skype                        |

---

NOTE: FM = family member; NS = Not specified; PWD = Person with dementia; RFID = Radio-frequency identification. \* indicates that study used a reminiscence kit.
